# Supplementary material
Source: PubMed Central journal article supplement (PMC3500145)
Supplement: NIHMS415275-supplement-1_si_001.pdf [file NIHMS415275-supplement-1_si_001.pdf]

Supporting Information for Carignan et al., 2012

“Predictors of Tetrabromobisphenol-A and Hexabromocyclododecanes in Milk  
from Boston Mothers”

*Courtney C. Carignan\**, Mohamed Abou-Elwafa Abdallah, Nerissa Wu, Wendy Heiger-Bernays,  
Michael D. McClean, Stuart Harrad, Thomas F. Webster

22 pages, 13 tables and 1 figure.

## **Methods**

### ***Study Participants and Sampling:***

We recruited participants at three sites: a health center in Lowell, Massachusetts that serves an ethnically diverse, working class community; a private obstetrics office in Cambridge, Massachusetts; and a maternity center in Brookline, Massachusetts. The Cambridge and Brookline facilities serve similar populations, predominantly white and highly educated.

Questionnaires were administered to each participant in person to collect information on demographics, general health, and potential variables for flame retardant exposure such as pre-pregnancy dietary consumption, use and possession of consumer electronics, residential and occupational history, recent home renovations, home carpeting, hobbies, and typical methods of transportation. Participants were asked if they regularly chose to eat organic foods (products grown or produced without chemicals) for a particular type of food (yes/no) as well as how often. For the general food frequency questionnaire dietary serving sizes were defined by United States Department of Agriculture guidelines and visual aids were used to help participants estimate quantities consumed. Participants were asked to estimate the number of serving sizes consumed per week. The amount of dairy fat consumed per day was estimated based on questionnaire responses and industry established fat content for each product. Homes were considered carpeted if one or more rooms had wall-to-wall carpeting installed. Household electronics were categorized as follows: stereo and video electronics (i.e., TVs, CD players, DVD players and stereos), personal computers, auxiliary electronics (i.e., printer, copier, scanner and fax machines), and other small appliances.

***Determination of lipid weight in milk:***

Lipid weight was determined gravimetrically according to the European Standard EN 1528-2:1996, Part 2. Briefly, ~ 10 mL of freeze-dried human milk was weighed and transferred into 100 mL separating funnel. One mL saturated potassium oxalate was then added together with 10 mL of ethanol and 20 mL of hexane/diethyl ether (1:1, v/v). The mixture was shaken for about 15 min and the bottom layer was removed into another separating funnel before another 10 mL of hexane/diethyl ether (1:1, v/v) together with 5 mL of ethanol was added. The lower layer was removed and the upper layer combined with the upper layer from the first funnel. Ten mL of water was added to this organic phase before the lower layer was again removed. The organic phase was filtered through anhydrous sodium sulphate and then the lipid content was gravimetrically determined.

***Limits of Detection (LOD):***

Method limits of detection (LODs) were estimated based on 3:1 S:N ratios and were 9, 10, 8 and 9  $\text{pg g}^{-1}$  lipid weight (lw) for TBBP-A, HBCDs, TBCDs and PBCDs respectively.

**Table S1: Average recoveries (expressed as percent) of the <sup>13</sup>C-labelled internal standards.**

| Internal standard               | Average recovery (%) |
|---------------------------------|----------------------|
| <sup>13</sup> C- $\alpha$ -HBCD | 78                   |
| <sup>13</sup> C- $\beta$ -HBCD  | 77                   |
| <sup>13</sup> C- $\gamma$ -HBCD | 85                   |
| <sup>13</sup> C-TBBP-A          | 83                   |

**Table S2: Recoveries (expressed as percent) of d<sub>18</sub>- $\alpha$ -HBCD used as extraction/clean-up evaluation standard.**

| Sample # | Recovery (%) |
|----------|--------------|
| 1        | 94           |
| 2        | 87           |
| 3        | 92           |
| 4        | 90           |
| 5        | 89           |

**Table S3a: Concentrations of HBCD isomers in SRM2585 compared to the indicative values.**

|                | Average concentration (ng g <sup>-1</sup> ) $\pm$ standard deviation (n=7) |               |
|----------------|----------------------------------------------------------------------------|---------------|
|                | Measured                                                                   | Indicative    |
| $\alpha$ -HBCD | 22 $\pm$ 2.3                                                               | 19 $\pm$ 3.7  |
| $\beta$ -HBCD  | 4.1 $\pm$ 0.9                                                              | 4.3 $\pm$ 1.1 |
| $\gamma$ -HBCD | 125 $\pm$ 18                                                               | 120 $\pm$ 22  |

**Table S3b: Summary of standard addition method results for TBBP-A.**

| Mass added (ng) | Mass recovered (ng) | Recovery (%) | RSD (%) (n=5) |
|-----------------|---------------------|--------------|---------------|
| 10.0            | 8.2                 | 82.0         | 3.6           |
| 40.0            | 35.8                | 89.5         | 4.2           |
| 80.0            | 76.1                | 95.1         | 4.7           |

**Table S4.** Characteristics of recruited cohort and samples analyzed for the current study (n=43).

---

| Characteristic                   |              |
|----------------------------------|--------------|
| Age                              |              |
| Mean (range)                     | 32.6 (20-41) |
| Body Mass Index (BMI)            |              |
| Mean (range)                     | 23.2 (18-39) |
| Race/Ethnicity                   |              |
| White                            | 38           |
| Not White                        | 5            |
| Highest Education Level Achieved |              |
| Some high school                 | 0            |
| High school graduate             | 2            |
| Some college                     | 2            |
| College graduate                 | 39           |
| Recruitment Location             |              |
| Brookline                        | 27           |
| Cambridge                        | 12           |
| Lowell                           | 4            |

---

**Table S5.** Concentrations of lipids and target compounds in the analyzed human milk samples.

| Sample No. | Lipid weight (g/100 ml) | Analyte concentration (pg/g lipid weight) |               |                |                |       |       |        |
|------------|-------------------------|-------------------------------------------|---------------|----------------|----------------|-------|-------|--------|
|            |                         | $\alpha$ -HBCD                            | $\beta$ -HBCD | $\gamma$ -HBCD | $\Sigma$ HBCDs | PBCDs | TBCDs | TBBP-A |
| 1          | 0.79                    | 249                                       | 37            | 72             | 359            | <LOQ  | <LOQ  | 182    |
| 2          | 3.09                    | 245                                       | 46            | 77             | 368            | <LOQ  | <LOQ  | <LOQ   |
| 3          | 1.12                    | 252                                       | 40            | 105            | 398            | <LOQ  | <LOQ  | <LOQ   |
| 4          | 1.86                    | 313                                       | 38            | 70             | 421            | <LOQ  | <LOQ  | <LOQ   |
| 5          | 1.50                    | 317                                       | 39            | 74             | 429            | <LOQ  | <LOQ  | <LOQ   |
| 6          | 0.82                    | 299                                       | 53            | 81             | 433            | <LOQ  | <LOQ  | <LOQ   |
| 7          | 1.00                    | 344                                       | 32            | 68             | 443            | <LOQ  | <LOQ  | 172    |
| 8          | 0.82                    | 365                                       | 37            | 88             | 491            | <LOQ  | <LOQ  | <LOQ   |
| 9          | 2.55                    | 331                                       | 53            | 132            | 516            | <LOQ  | 58    | 87     |
| 10         | 2.05                    | 328                                       | 59            | 152            | 539            | <LOQ  | <LOQ  | <LOQ   |
| 11         | 2.30                    | 346                                       | 51            | 144            | 542            | <LOQ  | <LOQ  | <LOQ   |
| 12         | 1.45                    | 426                                       | 57            | 85             | 568            | <LOQ  | <LOQ  | <LOQ   |
| 13         | 1.33                    | 405                                       | 67            | 158            | 630            | <LOQ  | 62    | <LOQ   |
| 14         | 1.32                    | 418                                       | 65            | 173            | 657            | <LOQ  | <LOQ  | <LOQ   |
| 15         | 2.65                    | 480                                       | 63            | 138            | 681            | 67    | 96    | <LOQ   |
| 16         | 2.27                    | 523                                       | 47            | 125            | 695            | <LOQ  | <LOQ  | <LOQ   |
| 17         | 4.26                    | 485                                       | 61            | 150            | 696            | <LOQ  | <LOQ  | <LOQ   |
| 18         | 3.77                    | 552                                       | 63            | 101            | 716            | 57    | 89    | <LOQ   |
| 19         | 0.57                    | 517                                       | 82            | 131            | 730            | <LOQ  | <LOQ  | <LOQ   |
| 20         | 1.83                    | 620                                       | 79            | 91             | 791            | 52    | 122   | <LOQ   |
| 21         | 1.36                    | 639                                       | 51            | 140            | 830            | <LOQ  | <LOQ  | 146    |
| 22         | 1.69                    | 546                                       | 104           | 226            | 875            | <LOQ  | 84    | <LOQ   |
| 23         | 1.22                    | 641                                       | 58            | 177            | 876            | <LOQ  | 53    | <LOQ   |
| 24         | 1.33                    | 646                                       | 72            | 212            | 930            | 135   | 278   | <LOQ   |
| 25         | 1.82                    | 746                                       | 68            | 118            | 932            | <LOQ  | 84    | <LOQ   |
| 26         | 1.88                    | 703                                       | 41            | 245            | 989            | <LOQ  | <LOQ  | 258    |
| 27         | 0.92                    | 792                                       | 83            | 148            | 1023           | <LOQ  | <LOQ  | <LOQ   |
| 28         | 2.03                    | 799                                       | 74            | 152            | 1025           | 94    | 159   | <LOQ   |
| 29         | 0.77                    | 793                                       | 77            | 172            | 1043           | <LOQ  | 62    | <LOQ   |
| 30         | 1.55                    | 565                                       | 33            | 464            | 1062           | 66    | 80    | 153    |
| 31         | 1.43                    | 850                                       | 67            | 304            | 1221           | 128   | 174   | <LOQ   |
| 32         | 1.91                    | 1250                                      | 105           | 293            | 1648           | 174   | 211   | 83     |
| 33         | 1.51                    | 1287                                      | 99            | 364            | 1750           | <LOQ  | 92    | <LOQ   |
| 34         | 3.15                    | 1290                                      | 176           | 573            | 2039           | 152   | 211   | <LOQ   |
| 35         | 0.74                    | 1493                                      | 114           | 551            | 2158           | 91    | 301   | 202    |
| 36         | 4.69                    | 1666                                      | 239           | 260            | 2165           | 122   | 187   | 549    |
| 37         | 1.03                    | 1877                                      | 165           | 196            | 2239           | 69    | 66    | 127    |
| 38         | 1.59                    | 2332                                      | 188           | 306            | 2826           | 157   | <LOQ  | <LOQ   |
| 39         | 1.20                    | 2293                                      | 372           | 832            | 3497           | 109   | 346   | 406    |
| 40         | 2.68                    | 2374                                      | 349           | 924            | 3647           | 86    | 120   | 197    |
| 41         | 1.06                    | 4092                                      | 282           | 1108           | 5482           | 317   | 562   | 345    |
| 42         | 0.98                    | 4431                                      | 612           | 1310           | 6353           | 244   | 382   | 205    |
| 43         | 3.16                    | 3279                                      | 1635          | 3193           | 8106           | 184   | 406   | 250    |

**Table S6.** Univariate logistic regression for detection of PBCDs, TBCDs, and TBBP-A in the analyzed human milk samples, Odds Ratio (95% CI).

| Predictor       | n  | PBCDs               | TBCDs               | TBBP-A              |
|-----------------|----|---------------------|---------------------|---------------------|
| $\Sigma$ HBCDs  |    |                     |                     |                     |
| Low             | 21 | Reference           | Reference           | Reference           |
| High            | 22 | 12.9 (2.82 - 58.6)* | 20.3 (4.18 - 98.2)* | 4.25 (1.08 - 16.8)* |
| $\alpha$ -HBCD  |    |                     |                     |                     |
| Low             | 21 | Reference           | Reference           | Reference           |
| High            | 22 | 12.9 (2.82 - 58.6)* | 11.3 (2.67 - 47.4)* | 4.25 (1.08 - 16.8)* |
| $\beta$ -HBCD   |    |                     |                     |                     |
| Low             | 21 | Reference           | Reference           | Reference           |
| High            | 22 | 12.9 (2.82 - 58.6)* | 20.3 (4.18 - 98.2)* | 1.73 (0.49 - 6.18)  |
| $\gamma$ -HBCD  |    |                     |                     |                     |
| Low             | 21 | Reference           | Reference           | Reference           |
| High            | 22 | 12.9 (2.82 - 58.6)* | 20.3 (4.18 - 98.2)* | 4.25 (1.08 - 16.8)* |
| $\Sigma$ PBCDs  |    |                     |                     |                     |
| Non-Detect      | 25 | Reference           | Reference           | Reference           |
| Detect          | 18 | NA                  | 43.7 (4.86 - 394)*  | 5.00 (1.30 - 19.3)* |
| $\Sigma$ TBCDs  |    |                     |                     |                     |
| Non-Detect      | 19 | Reference           | Reference           | Reference           |
| Detect          | 24 | 43.7 (4.86 - 394)*  | NA                  | 3.17 (0.81 - 12.4)  |
| $\Sigma$ TBBP-A |    |                     |                     |                     |
| Non-Detect      | 28 | Reference           | Reference           | Reference           |
| Detect          | 15 | 5.00 (1.3 - 19.3)*  | 3.17 (0.91 - 12.4)  | NA                  |

\*Statistically significant at the  $\alpha = 0.05$  level.

**Table S7.** Univariate logistic regression for TBBP-A detection in the analyzed human milk samples.

| Predictor                         | n  | Odds Ratio | 95% CI        | p-value |
|-----------------------------------|----|------------|---------------|---------|
| Dietary consumption (per serving) |    |            |               |         |
| Animal products                   |    |            |               |         |
| Meat                              | 43 | 1.13       | 0.42 - 3.05   | 0.81    |
| Beef                              | 43 | 0.79       | 0.09 - 6.70   | 0.83    |
| Pork                              | 43 | 0.44       | 0.01 - 32.6   | 0.71    |
| Poultry                           | 43 | 1.72       | 0.36 - 8.13   | 0.49    |
| Fish                              | 43 | 0.91       | 0.17 - 4.87   | 0.92    |
| Salmon                            | 43 | 3.20       | 0.003 - >999  | 0.75    |
| Tuna                              | 43 | 0.49       | 0.008 - 32.3  | 0.74    |
| Other Fish                        | 43 | 3.65       | 0.11 - 117.3  | 0.46    |
| Eggs                              | 43 | 0.76       | 0.10 - 5.66   | 0.79    |
| Dairy                             | 43 | 0.71       | 0.42 - 1.20   | 0.20    |
| Milk                              | 43 | 0.70       | 0.25 - 1.99   | 0.50    |
| Cheese                            | 43 | 0.44       | 0.13 - 1.53   | 0.20    |
| Frozen Yogurt                     | 43 | 0.71       | 0.44 - 1.17   | 0.18    |
| Egg fat                           | 43 | 0.21       | <0.001 - >999 | 0.79    |
| Dairy fat                         | 43 | 0.13       | 0.01 - 1.75   | 0.12    |
| Milk Fat                          | 43 | 0.24       | <0.001 - >999 | 0.74    |
| Cheese Fat                        | 43 | 0.05       | <0.001 - 4.66 | 0.20    |
| Froz. Yogurt Fat                  | 43 | 0.10       | 0.002 - 6.67  | 0.28    |
| Makes organic choices             |    |            |               |         |
| Yes                               | 26 | 0.64       | 0.18 - 2.27   | 0.49    |
| No                                | 17 | Reference  |               |         |



**Table S7 (Continued).** Univariate logistic regression for TBBP-A detection.

| Predictor                                   | n  | Odds Ratio | 95% CI        | p-value |
|---------------------------------------------|----|------------|---------------|---------|
| <b>Vegetarian</b>                           |    |            |               |         |
| Yes                                         | 2  | 1.93       | 0.11 - 33.2   | 0.65    |
| No                                          | 41 | Reference  |               |         |
| <b>Lifestyle</b>                            |    |            |               |         |
| <b>Carpeting in the home</b>                |    |            |               |         |
| Yes                                         | 26 | 1.58       | 0.44 - 5.64   | 0.49    |
| No                                          | 17 | Reference  |               |         |
| <b>Use of a HEPA vacuum</b>                 |    |            |               |         |
| Yes                                         | 12 | 2.02       | 0.46 - 8.87   | 0.35    |
| No                                          | 23 | Reference  |               |         |
| <b>Transportation</b>                       |    |            |               |         |
| <b>Regularly uses public transportation</b> |    |            |               |         |
| Yes                                         | 15 | 0.18       | 0.03 - 0.94   | 0.04    |
| No                                          | 28 | Reference  |               |         |
| Hours in vehicle per week                   | 43 | 0.959      | 0.804 - 1.142 | 0.6366  |

**Table S7 (Continued).** Univariate logistic regression for TBBP-A detection.

| Predictor                          | n  | Odds Ratio | 95% CI      | p-value |
|------------------------------------|----|------------|-------------|---------|
| Electronic Items in the Home       |    |            |             |         |
| Counts (Odds Ratio: per item)      |    |            |             |         |
| Stereo and Video Electronics       | 43 | 1.00       | 0.73 - 1.37 | 0.99    |
| Television Only                    | 43 | 0.88       | 0.47 - 1.67 | 0.69    |
| Other Stereo and Video Electronics | 43 | 1.06       | 0.70 - 1.61 | 0.78    |
| Computer                           | 43 | 1.13       | 0.82 - 1.55 | 0.45    |
| Auxillary electronics              | 43 | 0.87       | 0.47 - 1.61 | 0.65    |
| Other small appliances             | 43 | 0.69       | 0.38 - 1.25 | 0.22    |
| Usage (hours/week)                 |    |            |             |         |
| Television Only                    | 43 | 0.99       | 0.95 - 1.04 | 0.66    |
| Other Stereo and Video Electronics | 43 | 1.03       | 0.99 - 1.08 | 0.20    |
| Computer                           | 43 | 1.01       | 0.98 - 1.03 | 0.64    |
| Auxillary electronics              | 43 | 0.99       | 0.96 - 1.02 | 0.64    |
| Breastfeeding                      |    |            |             |         |
| Day of lactation (days)            | 37 | 1.00       | 0.95 - 1.05 | 0.85    |
| Demographics                       |    |            |             |         |
| Maternal age (years)               | 43 | 0.96       | 0.84 - 1.11 | 0.60    |
| Race                               |    |            |             |         |
| White                              | 38 | 0.78       | 0.12 - 5.27 | 0.80    |
| Not White                          | 5  | Reference  |             |         |

**Table S7 (Continued).** Univariate logistic regression for TBBP-A detection.

| Predictor                     | n  | Odds Ratio | 95% CI        | p-value |
|-------------------------------|----|------------|---------------|---------|
| Pre-pregnancy body mass index | 43 | 1.08       | 0.94 - 1.25   | 0.27    |
| College Graduate              |    |            |               |         |
| Yes                           | 39 | 0.50       | 0.06 - 3.96   | 0.51    |
| No                            | 4  | Reference  |               |         |
| Cigarette Smoking             |    |            |               |         |
| Pre-Pregnancy Smoker          |    |            |               |         |
| Yes                           | 2  | <0.001     | <0.001 - >999 | 0.97    |
| No                            | 41 | Reference  |               |         |
| Ever Smoker (last 3 years)    |    |            |               |         |
| Yes                           | 4  | 0.41       | 0.04 - 4.06   | 0.45    |
| No                            | 37 | Reference  |               |         |

**Table S8.** Univariate linear regression for average levels of ΣHBCDs in the analyzed human milk samples ( $e^\beta$ =Multiplicative Increase).

| Predictor                                   | n  | $e^\beta$ | 95% CI      | p-value |
|---------------------------------------------|----|-----------|-------------|---------|
| Dietary consumption (per serving)           |    |           |             |         |
| Animal products                             |    |           |             |         |
| Meat                                        | 43 | 1.10      | 0.74 - 1.64 | 0.62    |
| Fish                                        | 43 | 0.62      | 0.33 - 1.18 | 0.14    |
| Eggs                                        | 43 | 1.66      | 0.78 - 3.55 | 0.18    |
| Dairy                                       | 43 | 1.00      | 0.82 - 1.22 | 0.97    |
| Dairy fat                                   | 43 | 1.08      | 0.45 - 2.60 | 0.86    |
| Dietary consumption controlling for organic |    |           |             |         |
| Meat                                        | 43 | 0.91      | 0.62 - 1.35 | 0.64    |
| Fish                                        | 43 | 0.53      | 0.30 - 0.94 | 0.03    |
| Eggs                                        | 43 |           |             |         |
| Dairy                                       | 43 | 1.01      | 0.84 - 1.21 | 0.93    |
| Dairy fat                                   | 43 | 0.99      | 0.44 - 2.24 | 0.98    |
| Organic controlling for dietary consumption |    |           |             |         |
| Meat                                        | 43 | 0.49      | 0.30 - 0.81 | 0.007   |
| Fish                                        | 43 | 0.47      | 0.30 - 0.74 | 0.002   |
| Eggs                                        | 43 |           | -           |         |
| Dairy                                       | 43 | 0.51      | 0.32 - 0.82 | 0.007   |
| Dairy fat                                   | 43 | 0.51      | 0.32 - 0.82 | 0.007   |
| Makes organic choices                       |    |           |             |         |
| No                                          | 17 | Reference |             |         |
| Yes                                         | 26 | 0.51      | 0.32 - 0.82 | 0.006   |

**Table S8 (Continued).** Univariate linear regression for average levels of ΣHBCDs.

| Predictor                            | n  | e <sup>β</sup> | 95% CI      | p-value |
|--------------------------------------|----|----------------|-------------|---------|
| Vegetarian                           |    |                |             |         |
| No                                   | 41 | Reference      |             |         |
| Yes                                  | 2  | 0.57           | 0.18 - 1.82 | 0.33    |
| Lifestyle                            |    |                |             |         |
| Carpeting in the home                |    |                |             |         |
| No                                   | 26 | Reference      |             |         |
| Yes                                  | 17 | 1.39           | 0.84 - 2.29 | 0.19    |
| Use of a special vacuum (i.e., HEPA) |    |                |             |         |
| No                                   | 23 | Reference      |             |         |
| Yes                                  | 12 | 0.94           | 0.55 - 1.61 | 0.82    |
| Transportation                       |    |                |             |         |
| Regularly use MBTA                   |    |                |             |         |
| No                                   | 28 | Reference      |             |         |
| Yes                                  | 15 | 0.71           | 0.43 - 1.18 | 0.18    |
| Hours in a vehicle per week          | 43 | 0.99           | 0.93 - 1.06 | 0.83    |
| Electronic items in the home         |    |                |             |         |
| Count (Odds Ratio: Per item)         |    |                |             |         |
| Stereo and video electronics         | 43 | 1.17           | 1.04 - 1.31 | 0.01    |
| Televisions only                     | 43 | 1.18           | 0.93 - 1.49 | 0.18    |
| Other stereo and video electronics   | 43 | 1.22           | 1.05 - 1.43 | 0.01    |
| Computer                             | 43 | 0.99           | 0.87 - 1.12 | 0.85    |
| Auxillary equipment                  | 43 | 0.86           | 0.68 - 1.09 | 0.20    |
| Other small appliances               | 43 | 1.09           | 0.87 - 1.37 | 0.43    |

**Table S8 (Continued).** Univariate linear regression for average levels of ΣHBCDs.

| Predictor                          | n  | e <sup>β</sup> | 95% CI      | p-value |
|------------------------------------|----|----------------|-------------|---------|
| Usage (hours/week)                 |    |                |             |         |
| Stereo and video electronics       | 43 | 1.00           | 0.99 - 1.01 | 0.96    |
| Televisions only                   | 43 | 1.01           | 0.99 - 1.02 | 0.38    |
| Other stereo and video electronics | 43 | 1.00           | 0.98 - 1.01 | 0.44    |
| Computer                           | 43 | 1.00           | 0.99 - 1.01 | 0.85    |
| Auxiliary equipment                | 43 | 1.00           | 0.99 - 1.01 | 0.86    |
| Breastfeeding                      |    |                |             |         |
| Day of lactation (days)            | 37 | 0.99           | 0.97 - 1.01 | 0.22    |
| Demographics                       |    |                |             |         |
| Maternal age (years)               | 43 | 0.97           | 0.92 - 1.03 | 0.31    |
| Race                               |    |                |             |         |
| Not white                          | 5  | Reference      |             |         |
| White                              | 38 | 0.51           | 0.24 - 1.07 | 0.07    |
| Pre-pregnancy body mass index      | 43 | 1.02           | 0.96 - 1.08 | 0.48    |
| Education                          |    |                |             |         |
| High school graduate               | 2  | Reference      |             |         |
| Some college                       | 2  | 1.39           | 0.28 - 6.87 | 0.68    |
| College graduate                   | 39 | 0.59           | 0.18 - 1.87 | 0.36    |
| College graduate                   |    |                |             |         |
| No                                 | 4  | Reference      |             |         |
| Yes                                | 39 | 0.50           | 0.22 - 1.14 | 0.10    |

**Table S8 (Continued).** Univariate linear regression for average levels of ΣHBCDs.

| Predictor                  | n  | e <sup>β</sup> | 95% CI      | p-value |
|----------------------------|----|----------------|-------------|---------|
| Recruitment location       |    |                |             |         |
| Brookline                  | 27 | Reference      |             |         |
| Cambridge                  | 12 | 1.10           | 0.63 - 1.91 | 0.73    |
| Lowell                     | 4  | 2.07           | 0.88 - 4.87 | 0.09    |
| Smokes cigarettes          |    |                |             |         |
| Pre-pregnancy smoker       |    |                |             |         |
| No                         | 41 | Reference      |             |         |
| Yes                        | 2  | 0.96           | 0.29 - 3.12 | 0.94    |
| Ever smoker (last 3 years) |    |                |             |         |
| No                         | 37 | Reference      |             |         |
| Yes                        | 4  | 1.31           | 0.54 - 3.16 | 0.54    |

**Table S9.** Summary statistics for reported concentrations of TBBP-A (pg/g lw) in human milk samples.

| Country | Sample Year | n    | Detection Frequency | Median | Range <sup>a</sup>      | Publication              |
|---------|-------------|------|---------------------|--------|-------------------------|--------------------------|
| USA     | 2004/05     | 43   | 35%                 | NR     | <30 - 550               | Current Study            |
| UK      | 2009/10     | 34   | 36%                 | <40    | <40 – 650               | Abdallah et al. 2011 [1] |
| China   | 2007        | 1237 | Pooled              | NR     | <60 <sup>b</sup> – 5100 | Shi et al. 2009 [2]      |
| France  | 2004-2006   | 77   | 44%                 | 480    | 62 - 37000              | Cariou et al. 2008 [3]   |

<sup>a</sup>Maximum value rounded

<sup>b</sup>pg/g ww

NR: Not reported



**Table S10.** Summary statistics for reported concentrations of  $\Sigma$ HBCDs (pg/g lw) in human milk samples.

| Country     | Sample Year | n                  | Detection Frequency | Median                  | Range <sup>d</sup>       | DC               | Publication                  |
|-------------|-------------|--------------------|---------------------|-------------------------|--------------------------|------------------|------------------------------|
| Japan       | 1988-2006   | 13-35 <sup>a</sup> | Pooled              | NR                      | 430 - 4000               | $\alpha$         | Kakimoto et al. 2008 [4]     |
| France      | 2005        | 23                 | 30%                 | NR                      | <LOD - 5000              | $\alpha$         | Antignac et al. 2008 [5]     |
| Sweden      | 1996-2006   | 177                | 44%                 | 250                     | <200 - 7800              | NR               | Lignell et al. 2008 [6]      |
| Russia      | 2000, 2002  | 14, 23             | 57%, 13%            | 450, 620                | 200 - 1670               | $\alpha$         | Polder et al. 2008 [7]       |
| USA         | 2002        | 9                  | NR                  | 500 <sup>b</sup>        | 200 - 900 <sup>b</sup>   | NA               | Ryan et al. 2006 [8]         |
| Philippines | 2004        | 33                 | NR                  | 620                     | 130 - 3200               | $\alpha$         | Malarvannan et al. 2009 [9]  |
| USA         | 2004/05     | 43                 | 100%                | 790                     | 360 - 8100               | $\alpha$         | Current Study                |
| Norway      | 1993-2001   | 85                 | 58%                 | NR                      | 400 - 20000              | NR               | Thomsen et al. 2005 [10]     |
| Norway      | 2003-2005   | 310                | 57%                 | 860                     | <200 - 31000             | NR               | Thomsen et al. 2010 [11]     |
| China       | 2007        | 1237               | Pooled              | NR                      | <50 - 2800 <sup>a</sup>  | $\alpha$         | Shi et al. 2009 [2]          |
| Ghana       | 2004, 2009  | 67                 | NR                  | 270 - 1000 <sup>e</sup> | <10 - 18000              | $\alpha$         | Asante et al. 2011 [12]      |
| Belgium     | 2006        | 178                | Pooled              | 1500 <sup>a</sup>       | NA                       | $\alpha$         | Colles et al. 2008 [13]      |
| Canada      | 2002/03     | 8                  | NR                  | 1600 <sup>b</sup>       | 400 - 19000 <sup>b</sup> | NA               | Ryan et al. 2006 [8]         |
| Australia   | 1993-2009   | NR                 | Pooled              | NR                      | 2500-19000 <sup>a</sup>  | $\alpha, \gamma$ | Toms et al. 2012 [14]        |
| Vietnam     | 2007        | 33                 | 100%                | 330-2000 <sup>e</sup>   | 70 - 7600                | $\alpha$         | Tue et al. 2010 [15]         |
| Mexico      | NR          | 7                  | 100%                | 2100 <sup>c</sup>       | 800 - 5400               | NR               | Lopez et al. 2004 [16]       |
| UK          | 2009/10     | 34                 | 100%                | 3830                    | 1040 - 22000             | $\alpha$         | Abdallah and Harrad 2011 [1] |
| Spain       | 2006-2007   | 33                 | 91%                 | 27000                   | 3000 - 188000            | $\gamma$         | Eljarrat et al. 2009 [17]    |

DC: Dominant congener

NR: Not reported

NA: Not applicable

a: Pooled

b:  $\alpha$ -HBCD only

c: Mean, as reported by Thomsen et al. 2010

d: Maximum value rounded

e: Medians presented for 4 cities

**Table S11.** Summary statistics for reported concentrations of PBCDs (pg/g lw) in human milk samples.

| Country | Sample Year | n  | Detection Frequency | Median | Range     | Publication                  |
|---------|-------------|----|---------------------|--------|-----------|------------------------------|
| USA     | 2004/05     | 39 | 42%                 | NR     | <30 - 320 | Current Study                |
| UK      | 2009/10     | 34 | 26%                 | <30    | <30 - 200 | Abdallah and Harrad 2011 [1] |

**Table S12.** Summary statistics for reported concentrations of TBCDs (pg/g lw) in human milk samples.

| Country | Sample Year | n  | Detection Frequency | Median | Range     | Publication                  |
|---------|-------------|----|---------------------|--------|-----------|------------------------------|
| USA     | 2004/05     | 39 | 56%                 | 50     | <30 - 530 | Current Study                |
| UK      | 2009/10     | 34 | 74%                 | 140    | <30 - 360 | Abdallah and Harrad 2011 [1] |

Table S13. Daily intake estimate for an infant (1 to <3 months) to BFRs from ingestion of human milk (ng/kg-day)<sup>1</sup>.

| Analyte | <i>Milk Intake Rate:</i>       |     | <i>Upper Percentile</i> |     |
|---------|--------------------------------|-----|-------------------------|-----|
|         | <i>Mean</i><br>(140 ml/kg-day) |     | <i>(190 ml/kg-day)</i>  |     |
|         | GM                             | Max | GM                      | Max |
| TBBP-A  | NR                             | 3.1 | NR                      | 4.2 |
| ΣHBCDs  | 5.7                            | 45  | 7.8                     | 62  |
| α-HBCD  | 4.0                            | 25  | 5.4                     | 33  |
| β-HBCD  | 0.45                           | 9.0 | 0.61                    | 12  |
| λ-HBCD  | 1.1                            | 18  | 1.5                     | 24  |
| PBCDs   | NR                             | 1.8 | NR                      | 2.4 |
| TBCDs   | 0.28                           | 3.0 | 0.38                    | 4.0 |

<sup>1</sup>C<sub>BFR</sub> (GM or Max: ng/g-lw) \* 4.0 g/100 ml \* Milk Intake Rate (Mean or Upper Percentile: ml/kg-day)  
 NR: Not reported due to low detection frequency (<50%).

Figure S1: LC-ESI-MS/MS chromatograms of (a) PBCDs and (b) TBCDs in human milk.

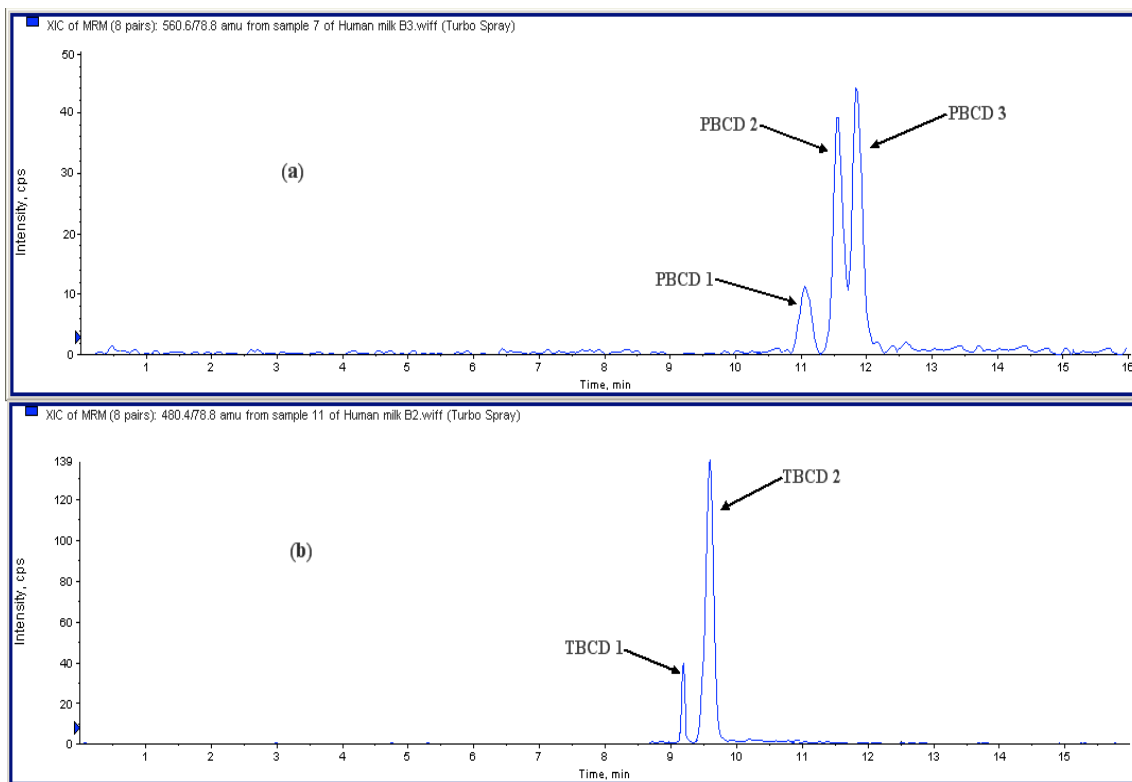

## REFERENCES

1. Abdallah, M. A.; Harrad, S., Tetrabromobisphenol-A, hexabromocyclododecane and its degradation products in UK human milk: Relationship to external exposure. *Environ Int* **2011**, *37*, (2), 443-448.
2. Shi, Z.-X.; Wu, Y.-N.; Li, J.-G.; Zhao, Y.-F.; Feng, J.-F., Dietary exposure assessment of Chinese adults and nursing infants to tetrabromobisphenol-A and hexabromocyclododecanes: Occurrence measurements in foods and human milk. *Environ Sci Technol* **2009**, *43*, (12), 4314-4319.
3. Cariou, R.; Antignac, J. P.; Zalko, D.; Berrebi, A.; Cravedi, J. P.; Maume, D.; Marchand, P.; Monteau, F.; Riu, A.; Andre, F.; Le bizec, B., Exposure assessment of French women and their newborns to tetrabromobisphenol-A: Occurrence measurements in maternal adipose tissue, serum, breast milk and cord serum. *Chemosphere* **2008**, *73*, (7), 1036-1041.
4. Kakimoto, K.; Akutsu, K.; Konishi, Y.; Tanaka, Y., Time trend of hexabromocyclododecane in the breast milk of Japanese women. *Chemosphere* **2008**, *71*, (6), 1110-1114.
5. Antignac, J.-P.; Cariou, R.; Daniel, M.; Philippe, M.; Fabrice, M.; Daniel, Z.; Alain, B.; Jean-Pierre, C.; François, A.; Bizec, B. L., Exposure assessment of fetus and newborn to brominated flame retardants in France: preliminary data. *Mol Nutr Food Res* **2008**, *52*, (2), 258-265.
6. Lignell, S.; Aune, M.; Darnerud, P. O.; Glynn, A. *Brominated flame retardants in mother's milk from primiparae women in Uppsala County, Sweden - updated temporal trends 1996-2006*; 2008-03-28, 2008.
7. Polder, A.; Gabrielsen, G. W.; Odland, J. O.; Savinova, T. N.; Tkachev, A.; Loken, K. B.; Skaare, J. U., Spatial and temporal changes of chlorinated pesticides, PCBs, dioxins (PCDDs/PCDFs) and brominated flame retardants in human breast milk from Northern Russia. *Science of The Total Environment* **2008**, *391*, (1), 41-54.

8. Ryan, J. J.; Wainman, B. C.; Schechter, A.; Moisey, J.; Kosarac, I.; Sun, W. F., Trends of the brominated flame retardants, PBDEs and HBCD, in human milks from North America. *Organohalogen Compd.* **2006**, *68*, 778-781.
9. Malarvannan, G.; Kunisue, T.; Isobe, T.; Sudaryanto, A.; Takahashi, S.; Prudente, M.; Subramanian, A.; Tanabe, S., Organohalogen compounds in human breast milk from mothers living in Payatas and Malate, the Philippines: Levels, accumulation kinetics and infant health risk. *Environmental Pollution* **2009**, *157*, (6), 1924-1932.
10. Thomsen, C.; Froshaug, M.; Broadwell, S. L.; Becher, G.; Eggesbo, M., Levels of brominated flame retardants in milk from the Norwegian human milk study: HUMIS. *Organohalogen Compd.* **2005**, *67*, 509-512.
11. Thomsen, C.; Stigum, H.; Froshaug, M.; Broadwell, S. L.; Becher, G.; Eggesbo, M., Determinants of brominated flame retardants in breast milk from a large scale Norwegian study. *Environ Int* **2010**, *36*, (1), 68-74.
12. Asante, K. A.; Adu-Kumi, S.; Nakahiro, K.; Takahashi, S.; Isobe, T.; Sudaryanto, A.; Devanathan, G.; Clarke, E.; Ansa-Asare, O. D.; Dapaah-Siakwan, S.; Tanabe, S., Human exposure to PCBs, PBDEs and HBCDs in Ghana: Temporal variation, sources of exposure and estimation of daily intakes by infants. *Environ Int* **2011**, *37*, (5), 921-928.
13. Colles, A.; Koppen, G.; Hanot, V.; Nelen, V.; Dewolf, M. C.; Noel, E.; Malisch, R.; Kotz, A.; Kypke, K.; Biot, P.; Vinkx, C.; Schoeters, G., Fourth WHO-coordinated survey of human milk for persistent organic pollutants (POPs): Belgian results. *Chemosphere* **2008**, *73*, (6), 907-914.
14. Toms LM; Guerra P; Eljarrat E; Barceló D; Harden FA; Hobson P; Sjodin A; Ryan E; JF., M., Brominated flame retardants in the Australian population: 1993-2009. *Chemosphere* **2012**, *89*, (4), 398-403.

15. Tue, N. M.; Sudaryanto, A.; Tu, B. M.; Isobe, T.; Takahashi, S.; Pham, H. V.; Tanabe, S.,  
Accumulation of polychlorinated biphenyls and brominated flame retardants in breast milk from women living in Vietnamese e-waste recycling sites. *Science of The Total Environment* **2010**, *408*, (9), 2155-2162.
16. Lopez, D.; Athanasiadou, M.; Athanasiadis, I.; Yanez estrada, L.; Diaz-Barriga, F.; Bergman, A.  
*Third annual workshop on brominated flame retardants*; Toronto, Canada, 2004; pp 482 - 487.
17. Eljarrat, E.; Guerra, P.; Martinez, E.; Farre, M.; Alvarez, J. G.; Lopez-Teijon, M.; Barcelo, D.,  
Hexabromocyclododecane in human breast milk: Levels and enantiomeric patterns. *Environ Sci Technol* **2009**, *43*, (6), 1940-1946.
